# Supplementary material
Source: PubMed Central journal article supplement (PMC7145753)
Supplement: NIHMS1552174-supplement-supplemental.pdf [file NIHMS1552174-supplement-supplemental.pdf]

## **Supplementary Information**

Supplemental Table 1 - Characteristics of persons for selected variables in quartiles at study entry

Supplemental Table 2 - Univariable associations with chest illness

Supplemental Table 3 - Association of vitamin D in categories and quartiles with chest illness with selected characteristics added to models with age (continuous), sex, smoking history, COPD history, and past chest illness

Supplemental Table 4 - Association of injury duration with chest illness, adjusted for age, sex, smoking history, COPD history, past illness, vitamin D in categories

Supplemental Table 5 - Association of SCI with chest illness, adjusting age, sex, smoking history, COPD history, and vitamin D in categories

**Supplemental Table 1. Characteristics of persons (n=253) for selected variables in quartiles at study entry**

|                                                  | Total Persons<br>n=253 | Persons With Chest Illnesses<br>n=60 | Number of Illnesses | Persons Without Chest Illnesses<br>n=193 |
|--------------------------------------------------|------------------------|--------------------------------------|---------------------|------------------------------------------|
| <b>Age in quartiles (years)†</b>                 |                        |                                      |                     |                                          |
| <44.1                                            | 63 (25)                | 12 (20)                              | 16                  | 51 (26)                                  |
| ≥44.1 - <53.7                                    | 64 (25)                | 17 (28)                              | 27                  | 47 (24)                                  |
| ≥53.7 - <63.3                                    | 63 (25)                | 15 (25)                              | 31                  | 48 (25)                                  |
| ≥63.3                                            | 63 (25)                | 16 (27)                              | 32                  | 47 (24)                                  |
| <b>Injury duration in quartiles (years)†</b>     |                        |                                      |                     |                                          |
| <6.0                                             | 64 (25)                | 14 (23)                              | 15                  | 50 (26)                                  |
| ≥6.0 - ≤13.8                                     | 63 (25)                | 15 (25)                              | 36                  | 48 (25)                                  |
| >13.8 - <25.2                                    | 63 (25)                | 16 (27)                              | 29                  | 47 (24)                                  |
| ≥27.2                                            | 63 (25)                | 15 (25)                              | 26                  | 48 (25)                                  |
| <b>BMI in quartiles (kg/m<sup>2</sup>)†</b>      |                        |                                      |                     |                                          |
| ≤22.8                                            | 64 (25)                | 15 (25)                              | 20                  | 51 (26)                                  |
| >22.8 - ≤26.8                                    | 63 (25)                | 29 (48)                              | 26                  | 46 (24)                                  |
| >26.8 - <30.6                                    | 63 (25)                | 16 (27)                              | 32                  | 48 (25)                                  |
| ≥30.6                                            | 63 (25)                | 26 (13)                              | 28                  | 48 (25)                                  |
| <b>%-Trunk fat in quartiles†</b>                 |                        |                                      |                     |                                          |
| ≤33                                              | 66 (26)                | 12 (20)                              | 21                  | 54 (28)                                  |
| >33 - ≤41                                        | 66 (26)                | 14 (23)                              | 21                  | 52 (27)                                  |
| >41 - ≤48                                        | 66 (26)                | 23 (38)                              | 52                  | 43 (22)                                  |
| >48                                              | 55 (22)                | 11 (18)                              | 12                  | 44 (23)                                  |
| <b>%-Total body fat in quartiles</b>             |                        |                                      |                     |                                          |
| <31                                              | 63 (25)                | 11 (18)                              | 20                  | 52 (27)                                  |
| ≥31 - <38                                        | 63 (25)                | 13 (22)                              | 24                  | 50 (26)                                  |
| ≥38 - <43                                        | 63 (25)                | 20 (33)                              | 30                  | 43 (22)                                  |
| ≥43                                              | 64 (25)                | 16 (27)                              | 32                  | 48 (25)                                  |
|                                                  | <i>n=244</i>           | <i>n=58</i>                          |                     | <i>n=186</i>                             |
| <b>FEV<sub>1</sub>/FVC in quartiles †</b>        |                        |                                      |                     |                                          |
| <0.71                                            | 61 (25)                | 18 (21)                              | 31                  | 43 (23)                                  |
| ≥0.71 - <0.77                                    | 61 (25)                | 13 (22)                              | 37                  | 48 (26)                                  |
| ≥0.77 - <0.84                                    | 61 (25)                | 17 (29)                              | 23                  | 44 (24)                                  |
| ≥0.84                                            | 61 (25)                | 10 (17)                              | 13                  | 51 (27)                                  |
| <b>%-Predicted FEV<sub>1</sub> in quartiles†</b> |                        |                                      |                     |                                          |
| ≤65.3                                            | 61 (25)                | 21 (36)                              | 31                  | 40 (22)                                  |
| >65.3 - ≤81.6                                    | 61 (25)                | 17 (29)                              | 39                  | 44 (24)                                  |
| >81.6 - ≤91.8                                    | 61 (25)                | 8 (14)                               | 10                  | 53 (28)                                  |
| >91.8                                            | 61 (25)                | 12 (21)                              | 24                  | 49 (26)                                  |
| <b>%-Predicted FVC, in quartiles†</b>            |                        |                                      |                     |                                          |
| ≤68.2                                            | 61 (25)                | 19 (33)                              | 29                  | 42 (23)                                  |
| 68.2 - ≤81.0                                     | 61 (25)                | 15 (26)                              | 33                  | 46 (25)                                  |
| >81.0 - ≤91.4                                    | 61 (25)                | 11 (19)                              | 19                  | 50 (27)                                  |
| >91.4                                            | 61 (25)                | 13 (22)                              | 23                  | 48 (26)                                  |

†n (%)

Supplemental Table 2. Univariable associations with chest illness (n=253)

| Covariate                                               | $\beta$ (SE)   | Relative Risk      | 95% Confidence Limits | P-Value   |
|---------------------------------------------------------|----------------|--------------------|-----------------------|-----------|
| <b>Age (yrs)</b>                                        | 0.019 (0.010)  | 1.02               | 1.00, 1.04            | 0.05      |
| <b>Age in quartiles (yrs)</b>                           |                |                    |                       |           |
| $\geq 63.3$                                             | 0.545 (0.422)  | 1.72               | 0.75, 3.94            | 0.20      |
| $\geq 53.7$ - $< 63.3$                                  | 0.719 (0.379)  | 2.05               | 0.98, 4.32            | 0.06      |
| $\geq 44.1$ - $< 53.7$                                  | 0.207 (0.344)  | 1.23               | 0.63, 2.41            | 0.55      |
| $< 44.1$                                                | Ref            |                    |                       |           |
| <b>Injury duration (yrs)</b>                            | 0.009 (0.012)  | 1.01               | 0.99, 1.03            | 0.44      |
| <b>Injury duration in quartiles (yrs)</b>               |                |                    |                       |           |
| $\geq 27.2$                                             | 0.329 (0.398)  | 1.39               | 0.64, 3.03            | 0.41      |
| $> 13.8$ - $< 25.2$                                     | 0.688 (0.377)  | 1.99               | 0.95, 4.16            | 0.07      |
| $\geq 6.0$ - $\leq 13.8$                                | 0.173 (0.381)  | 1.19               | 0.56, 2.51            | 0.65      |
| $< 6.0$                                                 | Ref            |                    |                       |           |
| <b>FEV<sub>1</sub>/FVC (n=244)</b>                      | -3.785 (0.918) | 0.68 (per SD=0.10) | 0.56, 0.81            | $< 0.001$ |
| $\leq 0.70$ (ref: $> 0.70$ )                            | 0.081 (0.287)  | 1.08               | 0.62, 1.90            | 0.78      |
| <b>FEV<sub>1</sub>/FVC in quartiles (n=244)</b>         |                |                    |                       |           |
| $< 0.71$                                                | 1.301 (0.517)  | 3.67               | 1.33, 10.12           | 0.01      |
| $\geq 0.71$ - $< 0.77$                                  | 1.728 (0.534)  | 5.63               | 1.98, 16.03           | 0.001     |
| $\geq 0.77$ - $< 0.84$                                  | 0.781 (0.603)  | 2.18               | 0.67, 7.12            | 0.20      |
| $\geq 0.84$                                             | Ref            |                    |                       |           |
| <b>%-Predicted FEV<sub>1</sub> (n=244)</b>              | -0.012 (0.008) | 0.79 (per SD=20.4) | 0.57, 1.08            | 0.14      |
| <b>%-Predicted FEV<sub>1</sub> in quartiles (n=244)</b> |                |                    |                       |           |
| $\leq 65.3$                                             | 0.525 (0.419)  | 1.69               | 0.74, 3.84            | 0.21      |
| $> 65.3$ - $\leq 81.6$                                  | 0.793 (0.445)  | 2.21               | 0.92, 5.29            | 0.07      |
| $> 81.6$ - $\leq 91.8$                                  | 0.018 (0.471)  | 1.02               | 0.40, 2.56            | 0.97      |
| $> 91.8$                                                | Ref            |                    |                       |           |
| <b>%-Predicted FVC (n=244)</b>                          | -0.004 (0.009) | 0.92 (per SD=19.1) | 0.65, 1.30            | 0.63      |
| <b>%-Predicted FVC in quartiles (n=244)</b>             |                |                    |                       |           |
| $\leq 68.2$                                             | 0.242 (0.383)  | 1.27               | 0.60, 2.70            | 0.53      |
| $68.2$ - $\leq 81.0$                                    | 0.493 (0.426)  | 1.64               | 0.71, 3.78            | 0.25      |
| $> 81.0$ - $\leq 91.4$                                  | 0.055 (0.403)  | 1.06               | 0.48, 2.33            | 0.89      |
| $> 91.4$                                                | Ref            |                    |                       |           |
| <b>Sex</b>                                              |                |                    |                       |           |
| Female (ref: Male)                                      | 0.737 (0.388)  | 2.09               | 0.98, 4.47            | 0.06      |
| <b>Race</b>                                             |                |                    |                       |           |
| Non-White (ref: White)                                  | -0.080 (0.435) | 0.92               | 0.39, 2.17            | 0.86      |
| <b>Pulmonary Medicine Use (n=244)</b>                   |                |                    |                       |           |
| Current Use (ref: Not currently taking)                 | 0.600 (0.533)  | 1.82               | 0.64, 5.18            | 0.26      |
| <b>Vitamin D (ng/ml)</b>                                | -0.006 (0.012) | 0.99               | 0.97, 1.02            | 0.63      |
| <b>Vitamin D (per 20 ng/ml)</b>                         | -0.112 (0.234) | 0.89               | 0.57, 1.41            | 0.63      |
| <b>Vitamin D Categories (ng/ml)</b>                     |                |                    |                       |           |
| $< 20$ (deficient)                                      | -0.019 (0.374) | 0.98               | 0.47, 2.04            | 0.96      |
| $\geq 20$ - $< 30$ (insufficient)                       | -0.148 (0.334) | 0.86               | 0.45, 1.66            | 0.66      |
| $\geq 30$ (normal)                                      | Ref            |                    |                       |           |
| <b>Vitamin D in quartiles (ng/ml)</b>                   |                |                    |                       |           |
| $< 19.9$                                                | 0.007 (0.370)  | 1.01               | 0.49, 2.08            | 0.99      |
| $\geq 19.9$ - $\leq 24.0$                               | -0.089 (0.390) | 0.91               | 0.43, 1.97            | 0.82      |

|                                             |                |      |             |        |
|---------------------------------------------|----------------|------|-------------|--------|
| >24.0 - ≤29.5                               | -0.172 (0.408) | 0.84 | 0.38, 1.87  | 0.67   |
| >29.5                                       | Ref            |      |             |        |
| <b>%-Trunk fat,</b>                         | 0.010 (0.011)  | 1.01 | 0.99, 1.03  | 0.36   |
| <b>%-Trunk fat, in quartiles</b>            |                |      |             |        |
| ≤33                                         | Ref            |      |             |        |
| >33 - ≤41                                   | 0.190 (0.365)  | 1.21 | 0.59, 2.47  | 0.60   |
| >41 - ≤48                                   | 0.560 (0.386)  | 1.75 | 0.82, 3.73  | 0.15   |
| >48                                         | 0.079 (0.400)  | 1.08 | 0.49, 2.37  | 0.84   |
| <b>%-Total body fat,</b>                    | 0.017 (0.017)  | 1.02 | 0.98, 1.05  | 0.33   |
| <b>%-Total body fat, in quartiles</b>       |                |      |             |        |
| <31                                         | Ref            |      |             |        |
| ≥31 - <38                                   | 0.340 (0.407)  | 1.40 | 0.63, 3.12  | 0.40   |
| ≥38 - <43                                   | 0.452 (0.386)  | 1.57 | 0.74, 3.35  | 0.24   |
| ≥43                                         | 0.470 (0.473)  | 1.60 | 0.63, 4.04  | 0.32   |
| <b>BMI (kg/m<sup>2</sup>)</b>               | 0.017 (0.018)  | 1.02 | 0.98, 1.05  | 0.34   |
| <b>BMI in categories (kg/m<sup>2</sup>)</b> |                |      |             |        |
| >30 (obese)                                 | 0.430 (0.339)  | 1.54 | 0.79, 2.99  | 0.20   |
| 25-30 (overweight)                          | 0.445 (0.340)  | 1.56 | 0.80, 3.04  | 0.19   |
| < 25 (normal or underweight)                | Ref            |      |             |        |
| <b>BMI in quartiles (kg/m<sup>2</sup>)</b>  |                |      |             |        |
| ≤22.8                                       | Ref            |      |             |        |
| >22.8 - ≤26.8                               | 0.548 (0.401)  | 1.73 | 0.79, 3.80  | 0.17   |
| >26.8 - <30.6                               | 0.341 (0.385)  | 1.41 | 0.66, 2.99  | 0.38   |
| ≥30.6                                       | 0.219 (0.403)  | 1.24 | 0.57, 2.74  | 0.59   |
| <b>Cigarette Smoking</b>                    |                |      |             |        |
| current                                     | 0.262 (0.450)  | 1.30 | 0.54, 3.14  | 0.56   |
| former                                      | 0.307 (0.332)  | 1.36 | 0.71, 2.60  | 0.35   |
| never                                       | Ref            |      |             |        |
| <b>Season</b>                               |                |      |             |        |
| Summer                                      | 0.084 (0.235)  | 1.09 | 0.69, 1.72  | 0.72   |
| Fall                                        | -0.16 (0.255)  | 0.85 | -0.66, 0.33 | 0.52   |
| Winter                                      | 0.300 (0.313)  | 1.35 | 0.73, 2.49  | 0.34   |
| Spring                                      | Ref            |      |             |        |
| <b>Medical conditions (ref: no)</b>         |                |      |             |        |
| COPD                                        | 0.609 (0.439)  | 1.84 | 0.78, 4.34  | 0.17   |
| Asthma                                      | 0.278 (0.340)  | 1.32 | 0.68, 2.57  | 0.41   |
| Obstructive Lung Disease (asthma or COPD)   | 0.498 (0.328)  | 1.65 | 0.87, 3.13  | 0.13   |
| Diabetes                                    | -0.485 (0.331) | 0.62 | 0.32, 1.18  | 0.14   |
| Heart Disease                               | 0.391 (0.376)  | 1.48 | 0.71, 3.09  | 0.30   |
| Hypertension                                | -0.451 (0.420) | 0.64 | 0.28, 1.45  | 0.28   |
| Chronic Cough                               | 0.002 (0.486)  | 1.00 | 0.39, 2.59  | 1.00   |
| Chronic Phlegm                              | 0.084 (0.318)  | 1.09 | 0.58, 2.03  | 0.79   |
| Any wheeze                                  | 0.020 (0.261)  | 1.02 | 0.61, 1.70  | 0.94   |
| Persistent wheeze                           | 0.061 (0.326)  | 1.06 | 0.56, 2.01  | 0.85   |
| Pneumonia/bronchitis after SCI              | 1.258 (0.322)  | 3.52 | 1.87, 6.61  | <0.001 |
| Chest illness in last year                  | 1.343 (0.343)  | 3.83 | 1.96, 7.50  | <0.001 |
| Chest illness in last 3 years               | 1.182 (0.318)  | 3.26 | 1.75, 6.09  | <0.001 |
| Pneumonia/bronchitis after SCI              |                |      |             |        |

|                                            |                |      |             |        |
|--------------------------------------------|----------------|------|-------------|--------|
| Yes and chest illness in last 3 years      | 2.012 (0.359)  | 7.48 | 3.70, 15.11 | <0.001 |
| Yes and no chest illness in last 3 years   | 1.112 (0.427)  | 3.04 | 1.32, 7.02  | 0.01   |
| No and chest illness in last 3 years       | 1.065 (0.585)  | 2.90 | 0.92, 9.12  | 0.07   |
| No and no chest illness in last 3 years    | Ref            |      |             |        |
| <b>SCI classification (ref: All AIS D)</b> |                |      |             |        |
| 4 categories                               |                |      |             |        |
| Motor complete cervical & AIS C            | -0.305 (0.355) | 0.74 | 0.37, 1.48  | 0.39   |
| Motor complete high thoracic & AIS C       | -1.091 (0.437) | 0.34 | 0.14, 0.79  | 0.01   |
| All other motor complete & AIS C           | -1.009 (0.446) | 0.36 | 0.15, 0.87  | 0.02   |
| 3 categories                               |                |      |             |        |
| Motor complete cervical & AIS C            | -0.305 (0.355) | 0.74 | 0.37, 1.48  | 0.39   |
| Combined thoracic/all other motor com      | -1.041 (0.367) | 0.35 | 0.17, 0.72  | 0.005  |
| 4 categories - AIS C as a separate group   |                |      |             |        |
| Motor complete cervical                    | -0.125 (0.365) | 0.88 | 0.43, 1.80  | 0.73   |
| Combined thoracic/all other motor com      | -0.999 (0.380) | 0.37 | 0.17, 0.78  | 0.01   |
| All AIS C                                  | -1.433 (0.515) | 0.24 | 0.09, 0.65  | 0.01   |

---

545 repeated measures, other than %-trunk and body fat, with 542 repeated measures

**Supplemental Table 3. Association of vitamin D in categories and quartiles with chest illness with selected characteristics added to models with age (continuous), sex, smoking history, COPD history, and past chest illness (n=253)**

| Characteristic                                  | RR   | 95% C.I.   | P-Value | Characteristic                                        | RR   | 95% C.I.   | P-Value |
|-------------------------------------------------|------|------------|---------|-------------------------------------------------------|------|------------|---------|
| <b>Age in quartiles (instead of continuous)</b> |      |            |         | <b>Injury duration in quartiles</b>                   |      |            |         |
| Vitamin D (ng/ml)                               |      |            |         | Vitamin D (ng/ml)                                     |      |            |         |
| <20 (deficient)                                 | 1.31 | 0.72, 2.37 | 0.37    | <20 (deficient)                                       | 1.42 | 0.76, 2.66 | 0.27    |
| ≥20 - <30 (insufficient)                        | 0.91 | 0.51, 1.62 | 0.75    | ≥20 - <30 (insufficient)                              | 0.88 | 0.48, 1.60 | 0.68    |
| ≥30 (sufficient)                                | Ref  | Ref        | Ref     | ≥30 (sufficient)                                      | Ref  | Ref        | Ref     |
| Vitamin D (ng/ml)                               |      |            |         | Vitamin D (ng/ml)                                     |      |            |         |
| <19.9                                           | 1.36 | 0.76, 2.45 | 0.30    | <19.9                                                 | 1.46 | 0.80, 2.67 | 0.22    |
| ≥19.9 - ≤24.0                                   | 1.14 | 0.57, 2.28 | 0.72    | ≥19.9 - ≤24.0                                         | 1.04 | 0.51, 2.14 | 0.90    |
| >24.0 - ≤29.5                                   | 0.77 | 0.36, 1.65 | 0.51    | >24.0 - ≤29.5                                         | 0.75 | 0.34, 1.64 | 0.47    |
| >29.5                                           | Ref  | Ref        | Ref     | >29.5                                                 | Ref  | Ref        | Ref     |
| <b>Injury duration, continuous</b>              |      |            |         | <b>SCI in 3 categories</b>                            |      |            |         |
| Vitamin D (ng/ml)                               |      |            |         | Vitamin D (ng/ml)                                     |      |            |         |
| <20 (deficient)                                 | 1.35 | 0.74, 2.45 | 0.33    | <20 (deficient)                                       | 1.33 | 0.70, 2.54 | 0.38    |
| ≥20 - <30 (insufficient)                        | 0.90 | 0.50, 1.63 | 0.73    | ≥20 - <30 (insufficient)                              | 0.92 | 0.52, 1.63 | 0.78    |
| ≥30 (sufficient)                                | Ref  | Ref        | Ref     | ≥30 (sufficient)                                      | ref  | ref        | ref     |
| Vitamin D (ng/ml)                               |      |            |         | Vitamin D (ng/ml)                                     |      |            |         |
| <19.9                                           | 1.40 | 0.78, 2.51 | 0.26    | <19.9                                                 | 1.37 | 0.72, 2.59 | 0.33    |
| ≥19.9 - ≤24.0                                   | 1.11 | 0.55, 2.24 | 0.77    | ≥19.9 - ≤24.0                                         | 1.12 | 0.56, 2.25 | 0.74    |
| >24.0 - ≤29.5                                   | 0.76 | 0.35, 1.66 | 0.49    | >24.0 - ≤29.5                                         | 0.77 | 0.37, 1.59 | 0.47    |
| >29.5                                           | Ref  | Ref        | Ref     | >29.5                                                 | Ref  | Ref        | Ref     |
| <b>SCI in 4 categories</b>                      |      |            |         | <b>SCI in 4 categories, AIS C as a separate group</b> |      |            |         |
| Vitamin D (ng/ml)                               |      |            |         | Vitamin D (ng/ml)                                     |      |            |         |
| <20 (deficient)                                 | 1.33 | 0.70, 2.55 | 0.39    | <20 (deficient)                                       | 1.33 | 0.70, 2.51 | 0.38    |
| ≥20 - <30 (insufficient)                        | 0.92 | 0.52, 1.63 | 0.78    | ≥20 - <30 (insufficient)                              | 0.88 | 0.50, 1.56 | 0.67    |
| ≥30 (sufficient)                                | Ref  | Ref        | Ref     | ≥30 (sufficient)                                      | Ref  | Ref        | Ref     |
| Vitamin D (ng/ml)                               |      |            |         | Vitamin D (ng/ml)                                     |      |            |         |
| <19.9                                           | 1.37 | 0.72, 2.60 | 0.34    | <19.9                                                 | 1.37 | 0.73, 2.57 | 0.33    |
| ≥19.9 - ≤24.0                                   | 1.12 | 0.57, 2.24 | 0.74    | ≥19.9 - ≤24.0                                         | 1.10 | 0.55, 2.19 | 0.80    |
| >24.0 - ≤29.5                                   | 0.77 | 0.37, 1.59 | 0.47    | >24.0 - ≤29.5                                         | 0.72 | 0.35, 1.47 | 0.37    |
| >29.5                                           | Ref  | Ref        | Ref     | >29.5                                                 | Ref  | Ref        | Ref     |
| <b>Any wheeze</b>                               |      |            |         | <b>Persistent wheeze</b>                              |      |            |         |
| Vitamin D (ng/ml)                               |      |            |         | Vitamin D (ng/ml)                                     |      |            |         |
| <20 (deficient)                                 | 1.33 | 0.72, 2.42 | 0.36    | <20 (deficient)                                       | 1.36 | 0.74, 2.50 | 0.32    |
| ≥20 - <30 (insufficient)                        | 0.90 | 0.51, 1.61 | 0.73    | ≥20 - <30 (insufficient)                              | 0.90 | 0.51, 1.59 | 0.71    |
| ≥30 (sufficient)                                | Ref  | Ref        | Ref     | ≥30 (sufficient)                                      | Ref  | Ref        | Ref     |
| Vitamin D (ng/ml)                               |      |            |         | Vitamin D (ng/ml)                                     |      |            |         |
| <19.9                                           | 1.37 | 0.76, 2.47 | 0.29    | <19.9                                                 | 1.41 | 0.78, 2.55 | 0.26    |
| ≥19.9 - ≤24.0                                   | 1.13 | 0.56, 2.27 | 0.74    | ≥19.9 - ≤24.0                                         | 1.10 | 0.55, 2.22 | 0.78    |
| >24.0 - ≤29.5                                   | 0.75 | 0.35, 1.59 | 0.45    | >24.0 - ≤29.5                                         | 0.76 | 0.36, 1.61 | 0.48    |
| >29.5                                           | Ref  | Ref        | Ref     | >29.5                                                 | Ref  | Ref        | Ref     |
| <b>Chronic cough</b>                            |      |            |         | <b>Chronic phlegm</b>                                 |      |            |         |
| Vitamin D (ng/ml)                               |      |            |         | Vitamin D (ng/ml)                                     |      |            |         |
| <20 (deficient)                                 | 1.38 | 0.76, 2.53 | 0.29    | <20 (deficient)                                       | 1.35 | 0.74, 2.46 | 0.33    |
| ≥20 - <30 (insufficient)                        | 0.91 | 0.51, 1.61 | 0.74    | ≥20 - <30 (insufficient)                              | 0.90 | 0.51, 1.60 | 0.72    |
| ≥30 (sufficient)                                | Ref  | Ref        | Ref     | ≥30 (sufficient)                                      | Ref  | Ref        | Ref     |

|                   |      |            |      |
|-------------------|------|------------|------|
| Vitamin D (ng/ml) |      |            |      |
| <19.9             | 1.43 | 0.79, 2.60 | 0.23 |
| ≥19.9 - <24.0     | 1.11 | 0.55, 2.25 | 0.77 |
| >24.0 - <29.5     | 0.76 | 0.35, 1.68 | 0.50 |
| >29.5             | Ref  | Ref        | Ref  |

**Heart disease**

|                          |      |            |      |
|--------------------------|------|------------|------|
| Vitamin D (ng/ml)        |      |            |      |
| <20 (deficient)          | 1.34 | 0.74, 2.44 | 0.34 |
| ≥20 - <30 (insufficient) | 0.91 | 0.50, 1.65 | 0.75 |
| ≥30 (sufficient)         | Ref  | Ref        | Ref  |

|                   |      |            |      |
|-------------------|------|------------|------|
| Vitamin D (ng/ml) |      |            |      |
| <19.9             | 1.39 | 0.77, 2.50 | 0.27 |
| ≥19.9 - <24.0     | 1.11 | 0.54, 2.28 | 0.79 |
| >24.0 - <29.5     | 0.78 | 0.36, 1.67 | 0.52 |
| >29.5             | Ref  | Ref        | Ref  |

**BMI in categories**

|                          |      |            |      |
|--------------------------|------|------------|------|
| Vitamin D (ng/ml)        |      |            |      |
| <20 (deficient)          | 1.27 | 0.67, 2.41 | 0.46 |
| ≥20 - <30 (insufficient) | 0.89 | 0.50, 1.60 | 0.71 |
| ≥30 (sufficient)         | Ref  | Ref        | Ref  |

|                   |      |            |      |
|-------------------|------|------------|------|
| Vitamin D (ng/ml) |      |            |      |
| <19.9             | 1.31 | 0.71, 2.44 | 0.39 |
| ≥19.9 - <24.0     | 1.07 | 0.54, 2.14 | 0.85 |
| >24.0 - <29.5     | 0.77 | 0.36, 1.66 | 0.51 |
| >29.5             | Ref  | Ref        | Ref  |

**%-Trunk fat**

|                          |      |            |      |
|--------------------------|------|------------|------|
| Vitamin D (ng/ml)        |      |            |      |
| <20 (deficient)          | 1.34 | 0.72, 2.52 | 0.36 |
| ≥20 - <30 (insufficient) | 0.89 | 0.50, 1.59 | 0.70 |
| ≥30 (sufficient)         | Ref  | Ref        | Ref  |

|                   |      |            |      |
|-------------------|------|------------|------|
| Vitamin D (ng/ml) |      |            |      |
| <19.9             | 1.40 | 0.76, 2.58 | 0.28 |
| ≥19.9 - <24.0     | 1.10 | 0.55, 2.23 | 0.78 |
| >24.0 - <29.5     | 0.76 | 0.36, 1.60 | 0.47 |
| >29.5             | Ref  | Ref        | Ref  |

**%-Total Fat**

|                          |      |            |      |
|--------------------------|------|------------|------|
| Vitamin D (ng/ml)        |      |            |      |
| <20 (deficient)          | 1.35 | 0.73, 2.51 | 0.34 |
| ≥20 - <30 (insufficient) | 0.90 | 0.50, 1.60 | 0.71 |
| ≥30 (sufficient)         | Ref  | Ref        | Ref  |

|                   |      |            |      |
|-------------------|------|------------|------|
| Vitamin D (ng/ml) |      |            |      |
| <19.9             | 1.41 | 0.77, 2.57 | 0.26 |
| ≥19.9 - <24.0     | 1.11 | 0.55, 2.25 | 0.77 |
| >24.0 - <29.5     | 0.76 | 0.36, 1.60 | 0.47 |
| >29.5             | Ref  | Ref        | Ref  |

**Asthma**

|                          |      |            |      |
|--------------------------|------|------------|------|
| Vitamin D (ng/ml)        |      |            |      |
| <20 (deficient)          | 1.41 | 0.79, 2.52 | 0.25 |
| ≥20 - <30 (insufficient) | 0.91 | 0.52, 1.61 | 0.75 |
| ≥30 (sufficient)         | Ref  | Ref        | Ref  |

|                   |      |            |      |
|-------------------|------|------------|------|
| Vitamin D (ng/ml) |      |            |      |
| <19.9             | 1.40 | 0.78, 2.52 | 0.26 |
| ≥19.9 - <24.0     | 1.10 | 0.55, 2.22 | 0.78 |
| >24.0 - <29.5     | 0.76 | 0.36, 1.62 | 0.48 |
| >29.5             | Ref  | Ref        | Ref  |

**BMI, continuous**

|                          |      |            |      |
|--------------------------|------|------------|------|
| Vitamin D (ng/ml)        |      |            |      |
| <20 (deficient)          | 1.35 | 0.73, 2.52 | 0.34 |
| ≥20 - <30 (insufficient) | 0.90 | 0.50, 1.60 | 0.72 |
| ≥30 (sufficient)         | Ref  | Ref        | Ref  |

|                   |      |            |      |
|-------------------|------|------------|------|
| Vitamin D (ng/ml) |      |            |      |
| <19.9             | 1.41 | 0.77, 2.57 | 0.27 |
| ≥19.9 - <24.0     | 1.11 | 0.55, 2.24 | 0.77 |
| >24.0 - <29.5     | 0.76 | 0.36, 1.61 | 0.48 |
| >29.5             | Ref  | Ref        | Ref  |

**BMI in quartiles**

|                          |      |            |      |
|--------------------------|------|------------|------|
| Vitamin D (ng/ml)        |      |            |      |
| <20 (deficient)          | 1.38 | 0.74, 2.57 | 0.32 |
| ≥20 - <30 (insufficient) | 0.93 | 0.52, 1.67 | 0.80 |
| ≥30 (sufficient)         | Ref  | Ref        | Ref  |

|                   |      |            |      |
|-------------------|------|------------|------|
| Vitamin D (ng/ml) |      |            |      |
| <19.9             | 1.43 | 0.78, 2.63 | 0.25 |
| ≥19.9 - <24.0     | 1.15 | 0.57, 2.30 | 0.70 |
| >24.0 - <29.5     | 0.79 | 0.37, 1.70 | 0.55 |
| >29.5             | Ref  | Ref        | Ref  |

**%-Trunk fat in quartiles**

|                          |      |            |      |
|--------------------------|------|------------|------|
| Vitamin D (ng/ml)        |      |            |      |
| <20 (deficient)          | 1.34 | 0.69, 2.59 | 0.39 |
| ≥20 - <30 (insufficient) | 0.86 | 0.47, 1.56 | 0.61 |
| ≥30 (sufficient)         | Ref  | Ref        | Ref  |

|                   |      |            |      |
|-------------------|------|------------|------|
| Vitamin D (ng/ml) |      |            |      |
| <19.9             | 1.40 | 0.74, 2.65 | 0.31 |
| ≥19.9 - <24.0     | 1.08 | 0.53, 2.20 | 0.82 |
| >24.0 - <29.5     | 0.70 | 0.33, 1.50 | 0.36 |
| >29.5             | Ref  | Ref        | Ref  |

**%-Total fat in quartiles**

|                          |      |            |      |
|--------------------------|------|------------|------|
| Vitamin D (ng/ml)        |      |            |      |
| <20 (deficient)          | 1.36 | 0.71, 2.58 | 0.35 |
| ≥20 - <30 (insufficient) | 0.87 | 0.49, 1.54 | 0.63 |
| ≥30 (sufficient)         | Ref  | Ref        | Ref  |

|                   |      |            |      |
|-------------------|------|------------|------|
| Vitamin D (ng/ml) |      |            |      |
| <19.9             | 1.41 | 0.76, 2.63 | 0.28 |
| ≥19.9 - <24.0     | 1.07 | 0.52, 2.17 | 0.86 |
| >24.0 - <29.5     | 0.74 | 0.35, 1.53 | 0.41 |
| >29.5             | Ref  | Ref        | Ref  |

**Obstructive lung disease (in place of COPD)**

|                          |      |            |      |
|--------------------------|------|------------|------|
| Vitamin D (ng/ml)        |      |            |      |
| <20 (deficient)          | 1.35 | 0.74, 2.48 | 0.33 |
| ≥20 - <30 (insufficient) | 0.90 | 0.51, 1.59 | 0.71 |
| ≥30 (sufficient)         | Ref  | Ref        | Ref  |

|                   |      |            |      |
|-------------------|------|------------|------|
| Vitamin D (ng/ml) |      |            |      |
| <19.9             | 1.46 | 0.83, 2.58 | 0.19 |
| ≥19.9 - ≤24.0     | 1.13 | 0.56, 2.26 | 0.73 |
| >24.0 - ≤29.5     | 0.76 | 0.37, 1.59 | 0.47 |
| >29.5             | Ref  | Ref        | Ref  |

|                        |      |            |      |
|------------------------|------|------------|------|
| Vitamin D per 20 ng/ml | 0.69 | 0.43, 1.10 | 0.12 |
|------------------------|------|------------|------|

**Pulmonary medicine use**

|                          |      |            |      |
|--------------------------|------|------------|------|
| Vitamin D (ng/ml)        |      |            |      |
| <20 (deficient)          | 1.36 | 0.74, 2.50 | 0.32 |
| ≥20 - <30 (insufficient) | 0.90 | 0.50, 1.61 | 0.71 |
| ≥30 (sufficient)         | Ref  | Ref        | Ref  |

|                   |      |            |      |
|-------------------|------|------------|------|
| Vitamin D (ng/ml) |      |            |      |
| <19.9             | 1.41 | 0.78, 2.55 | 0.25 |
| ≥19.9 - ≤24.0     | 1.10 | 0.54, 2.26 | 0.79 |
| >24.0 - ≤29.5     | 0.75 | 0.35, 1.61 | 0.46 |
| >29.5             | Ref  | Ref        | Ref  |

|                   |      |            |      |
|-------------------|------|------------|------|
| Vitamin D (ng/ml) |      |            |      |
| <19.9             | 1.40 | 0.77, 2.53 | 0.27 |
| ≥19.9 - ≤24.0     | 1.10 | 0.54, 2.23 | 0.80 |
| >24.0 - ≤29.5     | 0.76 | 0.36, 1.58 | 0.46 |
| >29.5             | Ref  | Ref        | Ref  |

|                        |      |            |      |
|------------------------|------|------------|------|
| Vitamin D per 20 ng/ml | 0.71 | 0.44, 1.14 | 0.16 |
|------------------------|------|------------|------|

**Season**

|                          |      |            |      |
|--------------------------|------|------------|------|
| Vitamin D (ng/ml)        |      |            |      |
| <20 (deficient)          | 1.34 | 0.73, 2.44 | 0.35 |
| ≥20 - <30 (insufficient) | 0.90 | 0.51, 1.60 | 0.72 |
| ≥30 (sufficient)         | Ref  | Ref        | Ref  |

|                   |      |            |      |
|-------------------|------|------------|------|
| Vitamin D (ng/ml) |      |            |      |
| <19.9             | 1.38 | 0.76, 2.50 | 0.29 |
| ≥19.9 - ≤24.0     | 1.07 | 0.53, 2.17 | 0.84 |
| >24.0 - ≤29.5     | 0.78 | 0.37, 1.64 | 0.51 |
| >29.5             | Ref  | Ref        | Ref  |



**Supplemental Table 4. Association of injury duration with chest illness, adjusted for age, sex, smoking history, COPD history, past illness, vitamin D in categories (n=253)**

| <b>Characteristic</b>              | <b>Relative Risk</b> | <b>95% C.I.</b> | <b>P-Value</b> |
|------------------------------------|----------------------|-----------------|----------------|
| Injury duration (yrs)              | 1.00                 | 0.98, 1.03      | 0.79           |
| Injury duration in quartiles (yrs) |                      |                 |                |
| $\geq 27.2$                        | 1.01                 | 0.45, 2.29      | 0.97           |
| $> 13.8 - < 25.2$                  | 1.62                 | 0.78, 3.37      | 0.20           |
| $\geq 6.0 - \leq 13.8$             | 0.96                 | 0.45, 2.04      | 0.91           |
| $< 6.0$                            | Ref                  | Ref             | Ref            |

**Supplemental Table 5. Association of SCI with chest illness, adjusting age, sex, smoking history, COPD history, and vitamin D in categories (n=253)**

| <b>Characteristic</b>                                | <b>Relative Risk</b> | <b>95% C.I.</b> | <b>P-Value</b> |
|------------------------------------------------------|----------------------|-----------------|----------------|
| <b>SCI in 3 categories</b>                           |                      |                 |                |
| SCI classification                                   |                      |                 |                |
| Motor complete cervical & AIS C                      | 0.58                 | 0.28, 1.22      | 0.15           |
| Motor high thoracic/all other motor complete & AIS C | 0.48                 | 0.24, 0.99      | 0.05           |
| All AIS D                                            | Ref                  | Ref             | Ref            |
| <b>SCI in 4 categories</b>                           |                      |                 |                |
| SCI classification                                   |                      |                 |                |
| Motor complete cervical & AIS C                      | 0.58                 | 0.28, 1.23      | 0.16           |
| Motor complete high thoracic & AIS C                 | 0.49                 | 0.17, 1.38      | 0.18           |
| All other motor complete & AIS C                     | 0.48                 | 0.21, 1.07      | 0.07           |
| All AIS D                                            | Ref                  | Ref             | Ref            |
| <b>SCI in 4 categories, AIS C as separate group</b>  |                      |                 |                |
| SCI classification                                   |                      |                 |                |
| Motor complete cervical                              | 0.80                 | 0.36, 1.75      | 0.57           |
| Motor high thoracic/all other motor complete         | 0.54                 | 0.25, 1.12      | 0.10           |
| All AIS C                                            | 0.19                 | 0.07, 0.49      | <0.001         |
| All AIS D                                            | Ref                  | Ref             | Ref            |
